# Supplementary material for: Differentially expressed serum proteins in children with or without asthma as determined using isobaric tags for relative and absolute quantitation proteomics
Source: PeerJ. 2020 Nov 3;8:e9971. doi: 10.7717/peerj.9971 (PMC7646293; doi:10.7717/peerj.9971)
Supplement: Supplemental Information 2 — In total, 103 proteins were identified in the serum of children with or without asthma, of which 46 DEPs were detected. As shown, 12 DEPs were upregulated and 34 DEPs were downregulated. [file peerj-08-9971-s002.xlsx]

## Sheet: A_vs_B_1.5_0.05.diff.all
Accession	Description	Coverage [%]	# Peptides	# PSMs	# Unique Peptides	# Protein Groups	# AAs	MW [kDa]	calc. pI	Score Sequest HT: Sequest HT	# Peptides (by Search Engine): Sequest HT	# Razor Peptides	Found in Sample: [S1] A1: Sample	Found in Sample: [S2] A2: Sample	Found in Sample: [S3] A3: Sample	Found in Sample: [S4] A4: Sample	Found in Sample: [S5] B1: Sample	Found in Sample: [S6] B2: Sample	Found in Sample: [S7] B3: Sample	Found in Sample: [S8] B4: Sample	A1	A2	A3	A4	B1	B2	B3	B4	Group_A.average	Group_B.average	Group_A.call.percent	Group_B.call.percent	Group_A.vs.Group_B.FC	pvalue
A0A087WW87	Immunoglobulin kappa variable 2-40 OS=Homo sapiens OX=9606 GN=IGKV2-40 PE=3 SV=2	28	4	33	1	1	121	13.3	4.61	60.14	4	2	High	Not Found	Peak Found	Peak Found	Not Found	Peak Found	Not Found	Peak Found	1.43619e+07	1.59348e+07	6.75757e+06	6.72722e+06	603597	1.88062e+06	3.52846e+06	5.65815e+06	1.09454e+07	2.91771e+06	1	1	3.75137	0.0241636
A0A193CHR8	10E8 light chain variable region (Fragment) OS=Homo sapiens OX=9606 PE=2 SV=1	17	2	11	2	1	109	11.6	9.2	8.03	2	0	High	High	High	High	High	High	High	High	1.84725e+08	7.09558e+07	1.11295e+08	7.88214e+07	6.09848e+06	6116556	7.01269e+07	4.32076e+07	1.11449e+08	3.13874e+07	1	1	3.55077	0.0382686
A2MYE1	A30 (Fragment) OS=Homo sapiens OX=9606 PE=4 SV=1	47	3	51	2	1	96	10.4	8.5	133.69	3	0	High	High	High	High	High	High	High	High	5.66513e+07	4.44001e+07	3.25751e+07	3.71266e+07	9.34988e+06	1.61056e+07	2.48051e+06	2.49086e+07	4.26883e+07	1.32111e+07	1	1	3.23124	0.00603292
A0A0B4J1X5	Immunoglobulin heavy variable 3-74 OS=Homo sapiens OX=9606 GN=IGHV3-74 PE=3 SV=1	32	3	55	1	1	117	12.8	8.66	154.2	3	0	High	High	High	High	High	High	High	High	2.27077e+07	1.40616e+07	6.20989e+06	2.76157e+07	6.03049e+06	3.36655e+06	6.86322e+06	6.22621e+06	1.76487e+07	5.62162e+06	1	1	3.13944	0.0459844
Q9UL81	Myosin-reactive immunoglobulin light chain variable region (Fragment) OS=Homo sapiens OX=9606 PE=2 SV=1	51	3	31	2	1	107	11.5	8.48	88.16	3	0	High	Not Found	High	Peak Found	Peak Found	Peak Found	Peak Found	High	2.18916e+06	NA	1.91484e+06	1.7921e+06	589037	116106	554528	1.27322e+06	1.96536e+06	633223	0.75	1	3.10375	0.00669658
A0A075B6S5	Immunoglobulin kappa variable 1-27 OS=Homo sapiens OX=9606 GN=IGKV1-27 PE=3 SV=1	29	2	15	1	1	117	12.7	8.29	39.57	2	0	High	Not Found	High	High	High	High	Peak Found	High	4.10747e+06	NA	3.99071e+06	NA	1.99499e+06	2.04724e+06	710626	1.04197e+06	4.04909e+06	1.44871e+06	0.5	1	2.79497	0.0068679
A2MYD2	V1-19 protein (Fragment) OS=Homo sapiens OX=9606 GN=V1-19 PE=4 SV=1	68	5	47	1	1	99	10.3	6.48	61.18	5	4	High	Not Found	High	Not Found	Peak Found	Peak Found	Not Found	Peak Found	9.37841e+07	1.63546e+08	6.88082e+07	5.99427e+07	4.43683e+07	2.54055e+07	3.26178e+07	4.50246e+07	9.65201e+07	3.68541e+07	1	1	2.61898	0.0470204
A0M8Q6	Immunoglobulin lambda constant 7 OS=Homo sapiens OX=9606 GN=IGLC7 PE=1 SV=3	46	4	472	1	1	106	11.2	8.29	1284.97	4	0	High	High	High	High	High	High	High	High	1.18821e+06	1.12329e+06	910403	954053	491510	641478	221749	351292	1.04399e+06	426507	1	1	2.44776	0.00150948
A0A218KGR2	Amyloid beta A4 protein isoform a OS=Homo sapiens OX=9606 GN=APP PE=4 SV=1	8	6	17	6	1	770	86.9	4.83	33.93	6	0	High	High	High	High	High	High	Peak Found	High	4.94267e+06	4.292e+06	5.31075e+06	3.91848e+06	4.02244e+06	2.72159e+06	893636	1.93802e+06	4.61597e+06	2.39392e+06	1	1	1.92821	0.0227181
A2N7P4	Immunoglobulin mu-chain D-J4-region (Fragment) OS=Homo sapiens OX=9606 GN=IGHM PE=4 SV=1	59	5	34	4	1	120	13.3	9.26	92.01	5	0	High	High	High	High	High	High	High	High	3.54591e+07	1.75048e+07	1.99456e+07	3.16372e+07	1.56081e+07	1.03981e+07	1.38966e+07	1.69673e+07	2.61367e+07	1.42175e+07	1	1	1.83834	0.0412254
P04430	Immunoglobulin kappa variable 1-16 OS=Homo sapiens OX=9606 GN=IGKV1-16 PE=1 SV=2	29	2	14	2	1	117	12.6	8.16	41.62	2	0	High	High	High	High	High	High	High	High	1.01773e+07	1.18895e+07	6.15308e+06	9.23092e+06	3.93187e+06	4999140	3.80334e+06	7.72406e+06	9.36269e+06	5.1146e+06	1	1	1.83058	0.0305127
P12273	Prolactin-inducible protein OS=Homo sapiens OX=9606 GN=PIP PE=1 SV=1	8	1	3	1	1	146	16.6	8.05	3.59	1	0	High	Peak Found	Not Found	High	Not Found	Peak Found	Not Found	High	374622	278457	NA	361256	NA	176255	NA	209320	338112	192787	0.75	0.5	1.75381	0.0376201
C9JF17	Apolipoprotein D (Fragment) OS=Homo sapiens OX=9606 GN=APOD PE=1 SV=1	34	10	141	10	1	215	24.1	5.6	257.03	10	0	High	High	High	High	High	High	High	High	5.91018e+08	2.27385e+08	5.54116e+08	5.73459e+08	5.97572e+08	8.30233e+08	7.70393e+08	7.27956e+08	4.86494e+08	7.31538e+08	1	1	0.665029	0.0493531
H0YMF1	Aggrecan core protein OS=Homo sapiens OX=9606 GN=ACAN PE=1 SV=2	1	3	18	3	1	2568	265.2	4.12	10.59	3	0	High	High	High	High	High	High	High	High	1.95948e+06	2.04175e+06	2.10332e+06	1.48287e+06	3.33346e+06	2.88384e+06	2.68237e+06	2.65773e+06	1.89686e+06	2.88935e+06	1	1	0.656499	0.00328957
Q12860	Contactin-1 OS=Homo sapiens OX=9606 GN=CNTN1 PE=1 SV=1	11	9	31	9	1	1018	113.2	5.9	48.8	9	0	High	High	High	High	High	High	High	High	4.11362e+06	3.71663e+06	4.63004e+06	4.82504e+06	7.34792e+06	9.13983e+06	5.32549e+06	6.27532e+06	4.32133e+06	7.02214e+06	1	1	0.615387	0.0196503
C9IZP8	Complement C1s subcomponent (Fragment) OS=Homo sapiens OX=9606 GN=C1S PE=1 SV=1	17	1	4	1	1	103	11.8	4.2	5.56	1	0	High	Not Found	Peak Found	Peak Found	High	Peak Found	High	Peak Found	1.47619e+06	NA	1.2245e+06	1.66292e+06	1.73729e+06	2.6528e+06	3.00573e+06	2.15759e+06	1.45454e+06	2.38835e+06	0.75	1	0.609012	0.042766
Q16853	Membrane primary amine oxidase OS=Homo sapiens OX=9606 GN=AOC3 PE=1 SV=3	11	8	51	8	1	763	84.6	6.52	83.96	8	0	High	High	High	High	High	High	High	High	1.03804e+07	6.96883e+06	9.337e+06	6.53165e+06	1.05151e+07	1.82886e+07	1.2833e+07	1.39366e+07	8.30448e+06	1.38933e+07	1	1	0.597731	0.0245823
Q07954	Prolow-density lipoprotein receptor-related protein 1 OS=Homo sapiens OX=9606 GN=LRP1 PE=1 SV=2	3	13	48	13	1	4544	504.3	5.39	70.71	13	0	High	High	High	High	High	High	High	High	3.81835e+06	3.89878e+06	4.60354e+06	3.02493e+06	6.03404e+06	8.91367e+06	6.10719e+06	4.78232e+06	3.8364e+06	6.4593e+06	1	1	0.593934	0.0304141
Q03692	Collagen alpha-1(X) chain OS=Homo sapiens OX=9606 GN=COL10A1 PE=1 SV=2	2	1	6	1	1	680	66.1	9.67	5.55	1	0	High	High	Peak Found	High	Peak Found	Not Found	High	High	560903	468569	474796	596484	948986	NA	974264	794141	525188	905797	1	0.75	0.579808	0.00146525
P05556	Integrin beta-1 OS=Homo sapiens OX=9606 GN=ITGB1 PE=1 SV=2	13	9	26	9	1	798	88.4	5.39	35.58	9	0	High	High	High	High	High	High	High	High	4.48366e+06	4.16534e+06	3.98884e+06	3.76442e+06	8.18909e+06	7.39569e+06	7.17841e+06	5.74161e+06	4.10056e+06	7.1262e+06	1	1	0.575421	0.00127712
A8K6K4	cDNA FLJ77565, highly similar to Homo sapiens interleukin 1 receptor accessory protein (IL1RAP), transcript variant 1, mRNA OS=Homo sapiens OX=9606 PE=2 SV=1	11	7	43	7	1	570	65.4	8.22	46.63	7	0	High	High	High	High	High	High	High	High	1.00707e+07	1.70391e+07	7.32587e+06	9.21829e+06	1.61646e+07	2.32356e+07	1.8082e+07	1.93808e+07	1.09135e+07	1.92158e+07	1	1	0.567945	0.0185937
P23470	Receptor-type tyrosine-protein phosphatase gamma OS=Homo sapiens OX=9606 GN=PTPRG PE=1 SV=4	5	6	35	6	1	1445	161.9	6.42	59.92	6	0	High	High	High	High	High	High	High	High	4.72121e+06	1.99647e+06	5.82547e+06	4.31287e+06	6.88205e+06	1.0428e+07	6.65745e+06	5.76947e+06	4.214e+06	7.43424e+06	1	1	0.566837	0.0485645
Q76LX8	A disintegrin and metalloproteinase with thrombospondin motifs 13 OS=Homo sapiens OX=9606 GN=ADAMTS13 PE=1 SV=1	7	9	27	9	1	1427	153.5	7.17	40.08	9	0	High	High	High	High	High	High	High	High	6.69805e+06	3.23895e+06	4.70994e+06	4.23164e+06	8.75496e+06	1.16413e+07	6.33678e+06	6.67303e+06	4.71964e+06	8.35151e+06	1	1	0.565124	0.0430743
P27487	Dipeptidyl peptidase 4 OS=Homo sapiens OX=9606 GN=DPP4 PE=1 SV=2	20	14	87	14	1	766	88.2	6.04	132.23	14	0	High	High	High	High	High	High	High	High	2.36643e+07	7.83773e+06	2.07381e+07	1.2944e+07	2.66285e+07	2.80837e+07	3.63844e+07	2.55765e+07	1.6296e+07	2.91683e+07	1	1	0.55869	0.0258112
P17301	Integrin alpha-2 OS=Homo sapiens OX=9606 GN=ITGA2 PE=1 SV=1	6	6	10	6	1	1181	129.2	5.31	19.36	6	0	Peak Found	Peak Found	High	Peak Found	High	High	High	Peak Found	2.1855e+06	1.44233e+06	1.36077e+06	1.44412e+06	3.78214e+06	2.83229e+06	3.06716e+06	1.94513e+06	1.60818e+06	2.90668e+06	1	1	0.55327	0.022435
Q59EJ3	Heat shock 70kDa protein 1A variant (Fragment) OS=Homo sapiens OX=9606 PE=2 SV=1	6	4	18	2	1	709	77.4	6.3	33.36	4	0	High	Peak Found	Peak Found	Peak Found	High	High	High	Peak Found	690252	603009	903463	472682	1.54904e+06	1.24457e+06	1.32807e+06	720841	667352	1.21063e+06	1	1	0.551243	0.033205
Q59HB3	Apolipoprotein B variant (Fragment) OS=Homo sapiens OX=9606 PE=2 SV=1	57	101	1641	1	1	1615	183.5	6.8	3647.78	101	0	High	Not Found	High	High	High	High	High	High	1.38647e+06	NA	1.51808e+06	1.4995e+06	3.05582e+06	3.7342e+06	2.9688e+06	1.69259e+06	1.46801e+06	2.86285e+06	0.75	1	0.51278	0.0397801
B4DWA6	cDNA FLJ60094, highly similar to F-actin capping protein subunit beta OS=Homo sapiens OX=9606 PE=2 SV=1	3	1	2	1	1	335	37.5	6.14	0	1	0	Peak Found	Peak Found	Peak Found	Peak Found	High	Peak Found	High	Peak Found	1.28467e+07	1.76892e+06	5.99914e+06	1.63749e+07	1.59594e+07	21320194	2.11194e+07	1.61899e+07	9.24741e+06	1.86472e+07	1	1	0.495914	0.0406211
O15394	Neural cell adhesion molecule 2 OS=Homo sapiens OX=9606 GN=NCAM2 PE=1 SV=2	4	3	3	3	1	837	93	5.6	6.75	3	0	Peak Found	Not Found	Peak Found	Peak Found	Peak Found	High	Peak Found	Peak Found	531497	NA	766662	251083	1.02756e+06	1.3384e+06	835986	1.06862e+06	516414	1.06764e+06	0.75	1	0.483697	0.0252684
A0A3B3ISX9	Tenascin-X OS=Homo sapiens OX=9606 GN=TNXB PE=4 SV=1	13	32	187	32	1	4491	485.1	5.34	343.71	32	0	High	High	High	High	High	High	High	High	3.50314e+07	1.42998e+07	4.20072e+07	2.67193e+07	6.423e+07	8.7567e+07	4.75184e+07	4.59554e+07	2.95144e+07	6.13177e+07	1	1	0.481336	0.0312233
P60709	Actin, cytoplasmic 1 OS=Homo sapiens OX=9606 GN=ACTB PE=1 SV=1	57	17	216	7	1	375	41.7	5.48	491.22	17	10	High	High	High	High	High	High	High	High	1.62749e+08	1.12806e+08	1.45427e+08	1.01461e+08	2.12806e+08	2.92203e+08	3.60441e+08	2.35956e+08	1.30611e+08	2.75351e+08	1	1	0.474342	0.00680723
Q9UIU0	Dihydropyridine receptor alpha 2 subunit OS=Homo sapiens OX=9606 GN=CACNA2D1 PE=4 SV=1	8	7	17	7	1	1110	125.2	5.36	15.03	7	0	Peak Found	High	High	Peak Found	High	High	High	High	1.677e+06	1.44058e+06	2.97115e+06	893537	5.14885e+06	2.71551e+06	3.15367e+06	4.16331e+06	1.74557e+06	3.79533e+06	1	1	0.459925	0.0262696
P30740	Leukocyte elastase inhibitor OS=Homo sapiens OX=9606 GN=SERPINB1 PE=1 SV=1	27	8	38	8	1	379	42.7	6.28	67.36	8	0	High	Peak Found	High	High	High	High	High	High	1.01212e+07	8.82096e+06	5.43655e+06	7.52982e+06	1.59853e+07	1.8844e+07	2.11301e+07	1.63759e+07	7.97713e+06	1.80838e+07	1	1	0.441119	0.000638805
Q15063	Periostin OS=Homo sapiens OX=9606 GN=POSTN PE=1 SV=2	30	18	98	0	1	836	93.3	7.53	189.22	18	17	Not Found	Not Found	Not Found	Not Found	Not Found	Not Found	Not Found	Not Found	9.11574e+06	4.76154e+06	1.95754e+07	1.05522e+07	2.7208e+07	3.20985e+07	2.84947e+07	1.24208e+07	1.10012e+07	2.50555e+07	1	1	0.439074	0.0389053
A0A024RAG0	Alkaline phosphatase OS=Homo sapiens OX=9606 GN=ALPL PE=3 SV=1	10	4	11	4	1	524	57.3	6.67	20.15	4	0	Peak Found	High	High	High	High	High	Peak Found	High	2.46041e+06	221709	3.34277e+06	2.53767e+06	6.89328e+06	5.87247e+06	2.79049e+06	5.66997e+06	2.14064e+06	5.30655e+06	1	1	0.403396	0.0287414
A8K3K1	cDNA FLJ78096, highly similar to Homo sapiens actin, alpha, cardiac muscle (ACTC), mRNA OS=Homo sapiens OX=9606 PE=2 SV=1	30	11	140	1	1	377	42	5.39	271.9	11	0	High	Peak Found	High	High	High	High	High	High	7.97977e+06	699136	5.63286e+06	5.26926e+06	1.06844e+07	1.33086e+07	1.50649e+07	1.09352e+07	4.89526e+06	1.24983e+07	1	1	0.391675	0.00618722
A0A024R5Z9	Pyruvate kinase OS=Homo sapiens OX=9606 GN=PKM2 PE=3 SV=1	22	8	39	8	1	531	58	7.71	74.41	8	0	High	High	High	High	High	High	High	High	1.97852e+06	2.63176e+06	4.24073e+06	2.064e+06	6.96612e+06	1.06287e+07	5.3629e+06	5.06625e+06	2.72875e+06	7.006e+06	1	1	0.389488	0.0211965
A0A161I202	Lactoferrin OS=Homo sapiens OX=9606 GN=LTF PE=2 SV=1	26	15	79	15	1	711	78.3	8.18	145.95	15	0	High	High	High	High	High	High	High	High	1.20401e+07	3.4556e+06	1.49964e+07	1.7177e+07	2.74758e+07	3.46322e+07	2.45743e+07	3.75608e+07	1.19173e+07	3.10608e+07	1	1	0.383676	0.00417321
A0A140GPP7	Prolyl endopeptidase FAP OS=Homo sapiens OX=9606 PE=3 SV=1	7	6	21	5	1	760	87.7	6.55	26.95	6	0	High	Not Found	High	Peak Found	High	High	High	High	2.31724e+06	NA	1.3101e+06	280785	3.30161e+06	4.12522e+06	3.32565e+06	4.89734e+06	1.30271e+06	3.91246e+06	0.75	1	0.332964	0.0112245
Q59G88	Coronin (Fragment) OS=Homo sapiens OX=9606 PE=3 SV=1	8	5	23	5	1	558	59.6	8.13	39.59	5	0	High	High	High	High	High	High	High	High	1.74581e+06	2.59228e+06	2.32719e+06	1.42956e+06	3.85708e+06	7.94365e+06	5.10306e+06	7.61449e+06	2.02371e+06	6.12957e+06	1	1	0.330155	0.00701142
P08246	Neutrophil elastase OS=Homo sapiens OX=9606 GN=ELANE PE=1 SV=1	4	1	10	1	1	267	28.5	9.35	18.34	1	0	High	Not Found	High	Peak Found	High	High	High	High	907891	NA	1.78931e+06	341591	1.89885e+06	4.92419e+06	2.70716e+06	3.25041e+06	1.01293e+06	3.19515e+06	0.75	1	0.317021	0.0474651
P08311	Cathepsin G OS=Homo sapiens OX=9606 GN=CTSG PE=1 SV=2	9	2	9	2	1	255	28.8	11.19	16.09	2	0	Peak Found	Peak Found	High	High	High	High	High	Peak Found	754397	1.01132e+06	1.87213e+06	990374	3.41595e+06	6.52227e+06	2.80059e+06	2.77232e+06	1.15706e+06	3.87778e+06	1	1	0.298381	0.0261153
P05164	Myeloperoxidase OS=Homo sapiens OX=9606 GN=MPO PE=1 SV=1	14	8	16	8	1	745	83.8	8.97	31.35	8	0	Peak Found	Peak Found	Peak Found	Peak Found	High	High	High	High	824888	622635	822797	1.99761e+06	3.74386e+06	7.54617e+06	3.47236e+06	3.64643e+06	1.06698e+06	4.60221e+06	1	1	0.231841	0.0140356
B2RDY9	Adenylyl cyclase-associated protein OS=Homo sapiens OX=9606 PE=2 SV=1	11	4	8	4	1	475	51.6	8.22	10.3	4	0	Not Found	Peak Found	Not Found	Peak Found	Peak Found	High	High	High	NA	447115	NA	430124	1.21287e+06	1.94835e+06	1.93608e+06	2.48232e+06	438619	1.8949e+06	0.5	1	0.231473	0.0203764
A8K8D9	Glucose-6-phosphate 1-dehydrogenase OS=Homo sapiens OX=9606 PE=2 SV=1	4	2	3	2	1	515	59.3	6.73	2.01	2	0	Peak Found	Not Found	Peak Found	Not Found	High	High	Peak Found	Not Found	103957	NA	167737	NA	767694	639710	793571	NA	135847	733658	0.5	0.75	0.185163	0.00282298
P07737	Profilin-1 OS=Homo sapiens OX=9606 GN=PFN1 PE=1 SV=2	52	6	38	6	1	140	15	8.27	70	6	0	High	Peak Found	High	High	High	High	High	High	2.31147e+06	429675	4.94182e+06	4.18382e+06	3.00472e+07	4.00998e+07	1.50944e+07	8.41192e+06	2.96669e+06	2.34133e+07	1	1	0.12671	0.0301839
D3DP16	Fibrinogen gamma chain, isoform CRA_a OS=Homo sapiens OX=9606 GN=FGG PE=4 SV=1	68	20	147	1	1	334	37.7	6.29	295.54	20	0	Not Found	Not Found	Not Found	Not Found	High	High	High	Not Found	NA	NA	NA	NA	2.06892e+06	1.09793e+06	1.4145e+07	NA	NA	5.77061e+06	0	0.75	NA	NA
E1B4S9	Apolipoprotein B (Fragment) OS=Homo sapiens OX=9606 GN=APOB PE=4 SV=1	48	14	155	1	1	222	26.3	5.62	213.47	14	0	Not Found	Not Found	Not Found	Not Found	High	High	Not Found	Not Found	NA	NA	NA	NA	411988	783602	NA	NA	NA	597795	0	0.5	NA	NA
B2R853	cDNA, FLJ93744, highly similar to Homo sapiens keratin 6E (KRT6E), mRNA OS=Homo sapiens OX=9606 PE=2 SV=1	45	28	110	0	1	564	60	7.72	194.72	28	2	Not Found	Not Found	Not Found	Not Found	Not Found	Not Found	Not Found	Not Found	NA	NA	NA	NA	769487	NA	1.34044e+07	NA	NA	7.08695e+06	0	0.5	NA	NA
A0A0F7TD49	IGHV3-7 protein (Fragment) OS=Homo sapiens OX=9606 GN=IGHV3-7 PE=4 SV=1	30	3	40	1	1	105	12.1	6.57	46.35	3	0	Peak Found	Not Found	High	Peak Found	High	Not Found	Not Found	Not Found	449546	NA	926281	269450	NA	NA	NA	NA	548425	NA	0.75	0	NA	NA
P13929	Beta-enolase OS=Homo sapiens OX=9606 GN=ENO3 PE=1 SV=5	22	7	18	5	1	434	47	7.71	38.87	7	0	High	Peak Found	Not Found	Not Found	Not Found	Not Found	Not Found	Not Found	5.1208e+06	170794	NA	NA	NA	NA	NA	NA	2.6458e+06	NA	0.5	0	NA	NA
A0A0B4J1R4	4-hydroxyphenylpyruvate dioxygenase OS=Homo sapiens OX=9606 GN=HPD PE=1 SV=1	37	12	18	12	1	393	44.9	7.01	33.13	12	0	High	High	Peak Found	Not Found	Not Found	Not Found	Not Found	Not Found	3.0661e+07	4.81117e+06	351895	NA	NA	NA	NA	NA	1.19414e+07	NA	0.75	0	NA	NA
A0A2U8J8L9	Ig heavy chain variable region (Fragment) OS=Homo sapiens OX=9606 GN=IgH PE=2 SV=1	34	3	17	1	1	103	11.7	7.18	32.68	3	0	High	Peak Found	High	High	Not Found	Not Found	Not Found	Not Found	672172	247692	654073	1.35027e+06	NA	NA	NA	NA	731051	NA	1	0	NA	NA
P24298	Alanine aminotransferase 1 OS=Homo sapiens OX=9606 GN=GPT PE=1 SV=3	21	8	15	8	1	496	54.6	7.18	32.47	8	0	High	High	Not Found	Not Found	Not Found	Not Found	Not Found	Not Found	1.36096e+07	1.0826e+07	NA	NA	NA	NA	NA	NA	1.22178e+07	NA	0.5	0	NA	NA
P00966	Argininosuccinate synthase OS=Homo sapiens OX=9606 GN=ASS1 PE=1 SV=2	22	10	15	10	1	412	46.5	8.02	26.91	10	0	High	High	Not Found	Not Found	Not Found	Not Found	Not Found	Not Found	2.34642e+07	1.09105e+06	NA	NA	NA	NA	NA	NA	1.22776e+07	NA	0.5	0	NA	NA
F8W1S1	Keratin, type II cytoskeletal 74 OS=Homo sapiens OX=9606 GN=KRT74 PE=1 SV=1	5	3	13	1	1	543	59.4	7.44	25.06	3	0	Not Found	Not Found	Not Found	Not Found	High	Not Found	Peak Found	Not Found	NA	NA	NA	NA	2.53575e+06	NA	1.22972e+06	NA	NA	1.88274e+06	0	0.5	NA	NA
A0A1B0GW23	ABHD14A-ACY1 readthrough (Fragment) OS=Homo sapiens OX=9606 GN=ABHD14A-ACY1 PE=4 SV=1	21	10	18	10	1	586	65.4	6.67	22.91	10	0	High	High	Not Found	Not Found	Not Found	Not Found	Not Found	Not Found	2.14556e+07	3.24695e+06	NA	NA	NA	NA	NA	NA	1.23513e+07	NA	0.5	0	NA	NA
A0A2U8J995	Ig heavy chain variable region (Fragment) OS=Homo sapiens OX=9606 GN=IgH PE=2 SV=1	24	2	11	1	1	106	11.8	8.88	22.88	2	0	Not Found	Not Found	Not Found	Not Found	Not Found	Peak Found	Not Found	High	NA	NA	NA	NA	NA	986583	NA	944656	NA	965620	0	0.5	NA	NA
A0A384NY14	Dicarbonyl/L-xylulose reductase, isoform CRA_b OS=Homo sapiens OX=9606 GN=DCXR PE=2 SV=1	17	4	8	4	1	244	25.9	8.1	16.44	4	0	High	High	High	Not Found	Not Found	Not Found	Not Found	Not Found	8.30623e+06	2.58538e+06	91149.6	NA	NA	NA	NA	NA	3.66092e+06	NA	0.75	0	NA	NA
A0A024R2M6	Acetyl-Coenzyme A acyltransferase 1 (Peroxisomal 3-oxoacyl-Coenzyme A thiolase), isoform CRA_a OS=Homo sapiens OX=9606 GN=ACAA1 PE=2 SV=1	18	5	7	5	1	424	44.3	8.44	14.13	5	0	High	High	Not Found	Not Found	Not Found	Not Found	Not Found	Not Found	5.97378e+06	3.43907e+06	NA	NA	NA	NA	NA	NA	4.70643e+06	NA	0.5	0	NA	NA
Q6KB66	Keratin, type II cytoskeletal 80 OS=Homo sapiens OX=9606 GN=KRT80 PE=1 SV=2	8	3	8	2	1	452	50.5	5.67	12.71	3	0	Not Found	Not Found	Not Found	Not Found	High	Not Found	High	Not Found	NA	NA	NA	NA	426584	NA	423943	NA	NA	425264	0	0.5	NA	NA
Q08554	Desmocollin-1 OS=Homo sapiens OX=9606 GN=DSC1 PE=1 SV=2	6	4	6	4	1	894	99.9	5.43	12.58	4	0	Not Found	Not Found	Not Found	Not Found	High	Peak Found	High	Not Found	NA	NA	NA	NA	3.5989e+06	201527	1.9206e+06	NA	NA	1.90701e+06	0	0.75	NA	NA
A0A0S2Z430	Phosphoenolpyruvate carboxykinase 2 isoform 1 (Fragment) OS=Homo sapiens OX=9606 GN=PCK2 PE=2 SV=1	8	4	4	4	1	640	70.7	7.62	9.91	4	0	Peak Found	High	Not Found	Not Found	Not Found	Not Found	Not Found	Not Found	348027	5.43891e+06	NA	NA	NA	NA	NA	NA	2.89347e+06	NA	0.5	0	NA	NA
B2R6C0	Glycerol-3-phosphate dehydrogenase [NAD(+)] OS=Homo sapiens OX=9606 PE=2 SV=1	13	4	5	4	1	349	37.6	6.18	9.22	4	0	High	Not Found	Peak Found	Not Found	Not Found	Not Found	Not Found	Not Found	3.39301e+06	NA	351880	NA	NA	NA	NA	NA	1.87244e+06	NA	0.5	0	NA	NA
X5CMJ9	Proteasome subunit beta OS=Homo sapiens OX=9606 GN=PSM8 PE=3 SV=1	14	3	4	3	1	276	30.3	7.43	7.91	3	0	High	High	Not Found	Not Found	Not Found	Not Found	Not Found	Not Found	2.35169e+06	1.6301e+06	NA	NA	NA	NA	NA	NA	1.99089e+06	NA	0.5	0	NA	NA
Q96N76	Urocanate hydratase OS=Homo sapiens OX=9606 GN=UROC1 PE=1 SV=1	7	4	7	4	1	676	74.8	6.79	7.71	4	0	High	High	Not Found	Not Found	Not Found	Not Found	Not Found	Not Found	4.93467e+06	1.1386e+06	NA	NA	NA	NA	NA	NA	3.03663e+06	NA	0.5	0	NA	NA
P05109	Protein S100-A8 OS=Homo sapiens OX=9606 GN=S100A8 PE=1 SV=1	12	1	4	1	1	93	10.8	7.03	7.53	1	0	Not Found	Not Found	Not Found	Not Found	High	High	High	Not Found	NA	NA	NA	NA	NA	925139	574374	NA	NA	749756	0	0.5	NA	NA
A8K134	cDNA FLJ75245, highly similar to Homo sapiens carbamoyl-phosphate synthetase 1, mitochondrial (CPS1), mRNA OS=Homo sapiens OX=9606 PE=2 SV=1	2	3	3	3	1	1500	164.8	6.73	6.66	3	0	High	Peak Found	Not Found	Not Found	Not Found	Not Found	Not Found	Not Found	1.88508e+06	238011	NA	NA	NA	NA	NA	NA	1.06154e+06	NA	0.5	0	NA	NA
A0A024R231	Guanine deaminase, isoform CRA_b OS=Homo sapiens OX=9606 GN=GDA PE=4 SV=1	8	4	4	4	1	454	51	5.68	6.47	4	0	High	Peak Found	Not Found	Not Found	Not Found	Not Found	Not Found	Not Found	4.03521e+06	178971	NA	NA	NA	NA	NA	NA	2.10709e+06	NA	0.5	0	NA	NA
A0A0S2Z3G9	Actinin alpha 4 isoform 1 (Fragment) OS=Homo sapiens OX=9606 GN=ACTN4 PE=2 SV=1	2	2	7	2	1	911	104.8	5.44	6.29	2	0	Not Found	Not Found	Not Found	Not Found	High	High	High	High	NA	NA	NA	NA	476123	739915	468147	123497	NA	451920	0	1	NA	NA
P08567	Pleckstrin OS=Homo sapiens OX=9606 GN=PLEK PE=1 SV=3	4	1	2	1	1	350	40.1	8.28	6.24	1	0	Not Found	Not Found	Not Found	Not Found	High	High	Not Found	Not Found	NA	NA	NA	NA	367555	455313	NA	NA	NA	411434	0	0.5	NA	NA
Q9UJU6	Drebrin-like protein OS=Homo sapiens OX=9606 GN=DBNL PE=1 SV=1	4	1	2	1	1	430	48.2	5.05	5.83	1	0	Not Found	Not Found	Not Found	Not Found	High	High	Not Found	Not Found	NA	NA	NA	NA	347049	323252	NA	NA	NA	335151	0	0.5	NA	NA
A2NB43	Cold agglutinin FS-1 H-chain (Fragment) OS=Homo sapiens OX=9606 GN=IGH@ PE=2 SV=1	8	1	3	1	1	118	13	9.41	5.62	1	0	High	Not Found	Not Found	High	Not Found	High	Not Found	Not Found	1.93057e+06	NA	NA	528577	NA	NA	NA	NA	1.22957e+06	NA	0.5	0	NA	NA
A0A1U9X8E2	Proteasome subunit beta OS=Homo sapiens OX=9606 PE=3 SV=1	5	1	2	1	1	219	23.2	5.02	5.14	1	0	High	High	Not Found	Not Found	Not Found	Not Found	Not Found	Not Found	1.32231e+06	1.78169e+06	NA	NA	NA	NA	NA	NA	1.552e+06	NA	0.5	0	NA	NA
A6ND91	Putative L-aspartate dehydrogenase OS=Homo sapiens OX=9606 GN=ASPDH PE=1 SV=2	7	2	3	2	1	283	29.9	7.28	4.25	2	0	High	High	Not Found	Not Found	Not Found	Not Found	Not Found	Not Found	800972	708756	NA	NA	NA	NA	NA	NA	754864	NA	0.5	0	NA	NA
B2R4F3	cDNA, FLJ92068, highly similar to Homo sapiens Rho GDP dissociation inhibitor (GDI) beta (ARHGDIB),mRNA OS=Homo sapiens OX=9606 PE=2 SV=1	6	1	2	1	1	201	22.9	5.3	4.06	1	0	Not Found	Not Found	Not Found	Not Found	High	High	Peak Found	Not Found	NA	NA	NA	NA	734364	821937	911351	NA	NA	822551	0	0.75	NA	NA
B2RDI5	cDNA, FLJ96627, highly similar to Homo sapiens calpain 1, (mu/I) large subunit (CAPN1), mRNA OS=Homo sapiens OX=9606 PE=2 SV=1	3	2	2	2	1	714	81.8	5.54	3.98	2	0	Not Found	Not Found	Not Found	Not Found	High	Peak Found	Not Found	Not Found	NA	NA	NA	NA	1.2144e+06	89449.4	NA	NA	NA	651926	0	0.5	NA	NA
B9EKV4	Aldehyde dehydrogenase 9 family, member A1 OS=Homo sapiens OX=9606 GN=ALDH9A1 PE=2 SV=1	2	1	2	1	1	518	56.3	6.57	3.88	1	0	High	High	Not Found	Not Found	Not Found	Not Found	Not Found	Not Found	654485	878441	NA	NA	NA	NA	NA	NA	766463	NA	0.5	0	NA	NA
O00194	Ras-related protein Rab-27B OS=Homo sapiens OX=9606 GN=RAB27B PE=1 SV=4	5	1	2	1	1	218	24.6	5.52	3.7	1	0	Not Found	Not Found	Not Found	Not Found	High	High	Not Found	Not Found	NA	NA	NA	NA	141369	194720	NA	NA	NA	168044	0	0.5	NA	NA
B2RB23	cDNA, FLJ95265, highly similar to Homo sapiens acetyl-Coenzyme A acyltransferase 2 (mitochondrial 3-oxoacyl-Coenzyme A thiolase) (ACAA2), nuclear gene encoding mitochondrial protein, mRNA OS=Homo sapiens OX=9606 PE=2 SV=1	3	1	2	1	1	397	42	8.25	3.59	1	0	High	High	Not Found	Not Found	Not Found	Not Found	Not Found	Not Found	342132	765375	NA	NA	NA	NA	NA	NA	553754	NA	0.5	0	NA	NA
A0A024R0V4	Vasodilator-stimulated phosphoprotein isoform 1 OS=Homo sapiens OX=9606 GN=VASP PE=2 SV=1	3	1	2	1	1	380	39.8	8.94	3.41	1	0	Not Found	Not Found	Not Found	Not Found	High	High	Not Found	Not Found	NA	NA	NA	NA	452033	640058	NA	NA	NA	546045	0	0.5	NA	NA
A0A384MR27	Epididymis secretory sperm binding protein OS=Homo sapiens OX=9606 PE=2 SV=1	12	1	2	1	1	135	14.7	5.5	3.34	1	0	Not Found	Not Found	Not Found	Not Found	High	Peak Found	High	Not Found	NA	NA	NA	NA	334161	420552	200308	NA	NA	318340	0	0.75	NA	NA
V9HWC2	Epididymis secretory sperm binding protein Li 67p OS=Homo sapiens OX=9606 GN=HEL-S-67p PE=2 SV=1	8	1	1	1	1	189	19.9	6.79	3.27	1	0	Not Found	Not Found	Not Found	Not Found	High	Peak Found	Not Found	Not Found	NA	NA	NA	NA	1.09316e+06	155479	NA	NA	NA	624321	0	0.5	NA	NA
Q96P63	Serpin B12 OS=Homo sapiens OX=9606 GN=SERPINB12 PE=1 SV=1	4	1	1	1	1	405	46.2	5.53	2.72	1	0	Not Found	Not Found	Not Found	Not Found	High	Not Found	Peak Found	Not Found	NA	NA	NA	NA	1.16927e+06	NA	682417	NA	NA	925846	0	0.5	NA	NA
B2R960	cDNA, FLJ94230, highly similar to Homo sapiens thioredoxin-like 1 (TXNL1), mRNA OS=Homo sapiens OX=9606 PE=2 SV=1	6	2	2	2	1	289	32.2	4.96	2.65	2	0	Not Found	Not Found	Not Found	Not Found	High	Peak Found	Not Found	Not Found	NA	NA	NA	NA	608608	356387	NA	NA	NA	482497	0	0.5	NA	NA
A0A024R1G3	Myoglobin OS=Homo sapiens OX=9606 GN=MB PE=3 SV=1	17	2	3	2	1	166	18.5	7.55	2.52	2	0	Not Found	High	Peak Found	Not Found	Not Found	Not Found	Not Found	Not Found	NA	965443	195906	NA	NA	NA	NA	NA	580674	NA	0.5	0	NA	NA
B2CIS9	Caspase 14, apoptosis-related cysteine peptidase OS=Homo sapiens OX=9606 GN=CASP14 PE=2 SV=1	5	1	1	1	1	242	27.7	5.58	2.13	1	0	Not Found	Not Found	Not Found	Not Found	High	Not Found	Peak Found	Not Found	NA	NA	NA	NA	426012	NA	88708.4	NA	NA	257360	0	0.5	NA	NA
P08670	Vimentin OS=Homo sapiens OX=9606 GN=VIM PE=1 SV=4	6	2	2	2	1	466	53.6	5.12	2.05	2	0	High	Not Found	Not Found	Not Found	Peak Found	High	Peak Found	Peak Found	NA	NA	NA	NA	223359	725531	296514	470017	NA	428855	0	1	NA	NA
Q01469	Fatty acid-binding protein 5 OS=Homo sapiens OX=9606 GN=FABP5 PE=1 SV=3	7	1	1	1	1	135	15.2	7.01	1.98	1	0	Not Found	Not Found	Not Found	Not Found	High	Not Found	Peak Found	Not Found	NA	NA	NA	NA	1.56799e+06	NA	2.53199e+06	NA	NA	2.04999e+06	0	0.5	NA	NA
P05089	Arginase-1 OS=Homo sapiens OX=9606 GN=ARG1 PE=1 SV=2	4	1	1	1	1	322	34.7	7.21	1.92	1	0	Not Found	Not Found	Not Found	Not Found	High	Not Found	Peak Found	Not Found	NA	NA	NA	NA	537479	NA	190074	NA	NA	363776	0	0.5	NA	NA
V9HWB7	Epididymis luminal protein 60 OS=Homo sapiens OX=9606 GN=HEL60 PE=2 SV=1	2	2	2	2	1	889	98.3	6.68	1.89	2	0	High	Peak Found	Not Found	Not Found	Not Found	Not Found	Not Found	Not Found	1.25648e+06	93461.8	NA	NA	NA	NA	NA	NA	674970	NA	0.5	0	NA	NA
Q8TAA3	Proteasome subunit alpha-type 8 OS=Homo sapiens OX=9606 GN=PSMA8 PE=2 SV=3	4	1	2	1	1	256	28.5	8.98	1.79	1	0	Peak Found	High	Not Found	Not Found	High	Not Found	Not Found	Not Found	599810	1.47416e+06	NA	NA	NA	NA	NA	NA	1.03699e+06	NA	0.5	0	NA	NA
A0A2U8J997	Ig heavy chain variable region (Fragment) OS=Homo sapiens OX=9606 GN=IgH PE=2 SV=1	9	1	1	1	1	100	11.2	7.96	1.62	1	0	Peak Found	Not Found	Peak Found	High	Not Found	Not Found	Not Found	Not Found	914260	NA	623826	1.43436e+06	NA	NA	NA	NA	990814	NA	0.75	0	NA	NA
Q53FI7	Four and a half LIM domains 1 variant (Fragment) OS=Homo sapiens OX=9606 PE=2 SV=1	7	2	2	2	1	280	31.9	8.22	0	2	0	Not Found	Not Found	Not Found	Not Found	High	High	Not Found	Not Found	NA	NA	NA	NA	2.11869e+06	1.46955e+06	NA	NA	NA	1.79412e+06	0	0.5	NA	NA
Q13835	Plakophilin-1 OS=Homo sapiens OX=9606 GN=PKP1 PE=1 SV=2	1	1	1	1	1	747	82.8	9.13	0	1	0	Not Found	Not Found	Not Found	Not Found	Peak Found	Not Found	High	Not Found	NA	NA	NA	NA	219639	NA	403626	NA	NA	311632	0	0.5	NA	NA
P20160	Azurocidin OS=Homo sapiens OX=9606 GN=AZU1 PE=1 SV=3	4	1	1	1	1	251	26.9	9.5	0	1	0	Not Found	Not Found	Not Found	Not Found	Not Found	Peak Found	Peak Found	High	NA	NA	NA	NA	NA	532913	425401	604789	NA	521034	0	0.75	NA	NA
Q96QA5	Gasdermin-A OS=Homo sapiens OX=9606 GN=GSDMA PE=1 SV=4	3	1	1	1	1	445	49.3	5.29	0	1	0	Not Found	Not Found	Not Found	Not Found	High	Not Found	Peak Found	Not Found	NA	NA	NA	NA	235393	NA	97206.4	NA	NA	166300	0	0.5	NA	NA
A0A0U1RRM4	Polypyrimidine tract-binding protein 1 OS=Homo sapiens OX=9606 GN=PTBP1 PE=1 SV=1	8	2	2	2	1	588	62.4	9.1	0	2	0	High	Not Found	Peak Found	High	Not Found	Not Found	Not Found	Not Found	111873	NA	68656.3	100271	NA	NA	NA	NA	93600.2	NA	0.75	0	NA	NA
V9HW37	T-complex protein 1 subunit epsilon OS=Homo sapiens OX=9606 GN=HEL-S-69 PE=2 SV=1	2	1	1	1	1	541	59.6	5.66	0	1	0	Not Found	Not Found	Not Found	Not Found	High	Not Found	Not Found	Peak Found	NA	NA	NA	NA	249755	NA	NA	85342.4	NA	167549	0	0.5	NA	NA
Q9BYE9	Cadherin-related family member 2 OS=Homo sapiens OX=9606 GN=CDHR2 PE=1 SV=2	1	1	1	1	1	1310	141.5	4.5	0	1	0	Peak Found	High	Not Found	Not Found	Not Found	Not Found	Not Found	Not Found	112016	270553	NA	NA	NA	NA	NA	NA	191284	NA	0.5	0	NA	NA
Q3ZCW2	Galectin-related protein OS=Homo sapiens OX=9606 GN=LGALSL PE=1 SV=2	11	1	2	1	1	172	19	5.35	0	1	0	Not Found	Not Found	Not Found	Not Found	Peak Found	High	Not Found	Not Found	NA	NA	NA	NA	333516	537807	NA	NA	NA	435662	0	0.5	NA	NA
A8K139	cDNA FLJ76744, highly similar to Homo sapiens L1 cell adhesion molecule (L1CAM), transcript variant 1, mRNA OS=Homo sapiens OX=9606 PE=2 SV=1	1	1	1	1	1	1257	139.9	6.24	0	1	0	Not Found	Not Found	Not Found	Not Found	Peak Found	High	Peak Found	Peak Found	NA	NA	NA	NA	133896	243329	191396	267448	NA	209017	0	1	NA	NA
P30044	Peroxiredoxin-5, mitochondrial OS=Homo sapiens OX=9606 GN=PRDX5 PE=1 SV=4	4	1	1	1	1	214	22.1	8.7	0	1	0	Not Found	Not Found	Not Found	Not Found	High	Peak Found	Not Found	Not Found	NA	NA	NA	NA	214042	136432	NA	NA	NA	175237	0	0.5	NA	NA
